# Supplementary material for: Temporal Dynamics of Visual Attention Allocation
Source: PubMed Central journal article supplement (PMC6403260; doi:10.1038/s41598-019-40281-7), 2019-03-06
Supplement: 41598_2019_40281_MOESM1_ESM.pdf [file 41598_2019_40281_MOESM1_ESM.pdf]

## **Supplementary Information**

### **Temporal Dynamics of Visual Attention Allocation**

Jongmin Moon<sup>1a</sup>, Seonggyu Choe<sup>1a</sup>, Seul Lee<sup>1</sup>, and Oh-Sang Kwon<sup>1\*</sup>

<sup>1</sup>Department of Human Factors Engineering, Ulsan National Institute of Science and Technology, Ulsan 44919, Republic of Korea

<sup>a</sup>J.M. and S.C. contributed equally to this work.

\*Corresponding author: O.-S.K. (oskwon@unist.ac.kr)

## Modeling

We can derive the hazard rate by considering the probability of the target not being detected even though it has already appeared:

$$h(t) = \frac{f(t)(1 - P(A|ND))}{1 - F(t)} \quad (6)$$

where  $P(A|ND)$  is the probability that the target has been missed (i.e., target has appeared but was not detected).  $P(A|ND)$  was obtained by

$$P(A|ND) = \frac{P(ND|A)P(A)}{P(ND|NA)P(NA) + P(ND|A)P(A)} = \frac{0.5 \cdot F(t)}{1 \cdot (1 - F(t)) + 0.5 \cdot F(t)} \quad (7)$$

where  $P(A)$  and  $P(NA)$  are the probability that the target has appeared and has not appeared, respectively, and  $P(ND|A)$  and  $P(ND|NA)$  are the probability that the target is not detected given that it appeared and did not appeared, respectively. With equation (7), we can re-write the equation (6) to get equation (1).

Our model infers the expected value of the hazard rate at time  $t$ , given a sensory measurement  $m$ , and the target not being detected yet, which requires computations of  $p(t|m, ND)$ . By assuming the independence between the measurement of the elapsed time and failure to detect the target, the probability density can be computed as follows:

$$p(t|m, ND) = \frac{p(m, ND|t)p(t)}{\int p(m, ND|t)p(t)dt} = \frac{p(m|t)p(ND|t)}{\int p(m|t)p(ND|t)dt} \quad (8)$$

where  $p(t)$  can be dropped off since we assumed no prior preference on time  $t$ , and  $p(ND|t) = 1 - kF(t)$ , just as the denominator in equation (1), which allowed us to simplify the notation in equation (3).

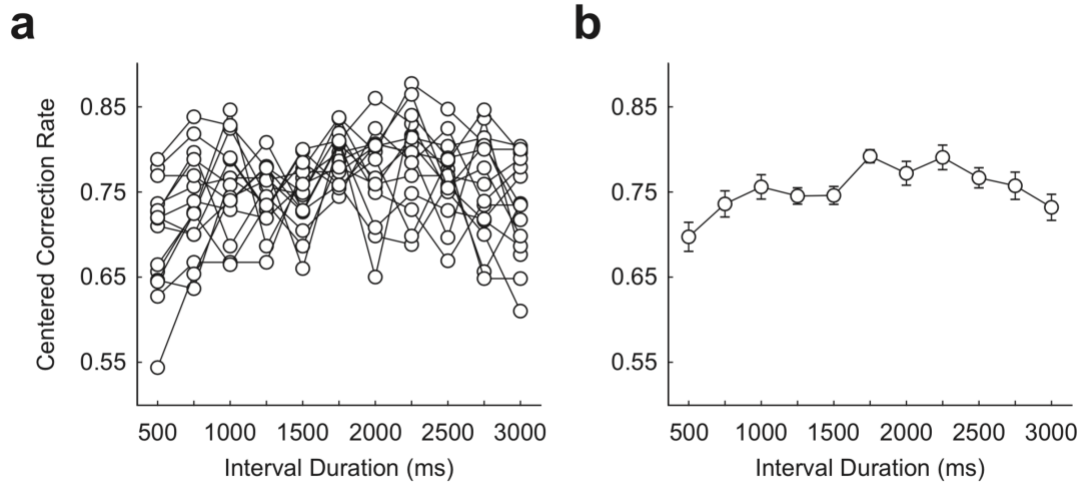

**Figure S1 (Related to Fig. 5).** Results of Experiment 3. We plot correction rates of (a) 15 subjects and (b) their means as a function of interval durations. They are qualitatively similar to the contrast threshold function (Fig. 5), except that they are flipped upside down. The error bars represent standard errors of the means ( $n = 15$ ).

| Interval duration (ms) |      | Mean diff. (95% CI) | <i>p</i> -value |
|------------------------|------|---------------------|-----------------|
| 775                    | 850  | .03 (-.02, .07)     | .260            |
|                        | 925  | .01 (-.04, .06)     | .642            |
|                        | 1000 | .02 (-.02, .07)     | .343            |
|                        | 1075 | -.04 (-.08, .01)    | .104            |
|                        | 1150 | -.05 (-.10, -.01)   | .019            |
|                        | 1225 | -.11 (-.15, -.06)   | .000            |
| 850                    | 925  | -.02 (-.06, .03)    | .507            |
|                        | 1000 | .00 (-.05, .04)     | .858            |
|                        | 1075 | -.06 (-.11, -.02)   | .007            |
|                        | 1150 | -.08 (-.13, -.04)   | .001            |
|                        | 1225 | -.13 (-.18, -.09)   | .000            |
| 925                    | 1000 | .01 (-.03, .06)     | .627            |
|                        | 1075 | -.05 (-.09, .00)    | .038            |
|                        | 1150 | -.07 (-.11, -.02)   | .005            |
|                        | 1225 | -.12 (-.16, -.07)   | .000            |
| 1000                   | 1075 | -.06 (-.11, -.01)   | .011            |
|                        | 1150 | -.08 (-.12, -.03)   | .001            |
|                        | 1225 | -.13 (-.18, -.08)   | .000            |
| 1075                   | 1150 | -.02 (-.06, .03)    | .461            |
|                        | 1225 | -.07 (-.12, -.02)   | .003            |
| 1150                   | 1225 | -.05 (-.10, -.01)   | .024            |

**Table S1 (Related to Fig. 3).** Results of pairwise comparison in Experiment 1.

|      | 500                  | 750                  | 1000                | 1250                 | 1500                 | 1750               | 2000                | 2250               | 2500               | 2750               | 3000 |
|------|----------------------|----------------------|---------------------|----------------------|----------------------|--------------------|---------------------|--------------------|--------------------|--------------------|------|
| 500  |                      | .057                 | .004                | .018                 | .017                 | .000               | .000                | .000               | .001               | .003               | .087 |
| 750  | -.04<br>(-.08, .00)  |                      | .322                | .644                 | .620                 | .006               | .076                | .007               | .130               | .291               | .843 |
| 1000 | -.06<br>(-.10, -.02) | -.02<br>(-.06, .02)  |                     | .597                 | .620                 | .076               | .428                | .087               | .597               | .947               | .235 |
| 1250 | -.05<br>(-.09, -.01) | -.01<br>(-.05, .03)  | .01<br>(-.03, .05)  |                      | .974                 | .022               | .187                | .026               | .291               | .552               | .509 |
| 1500 | -.05<br>(-.09, -.01) | -.01<br>(-.05, .03)  | .01<br>(-.03, .05)  | .00<br>(-.04, .04)   |                      | .024               | .199                | .028               | .306               | .574               | .488 |
| 1750 | -.09<br>(-.13, -.05) | -.06<br>(-.10, -.02) | -.04<br>(-.08, .00) | -.05<br>(-.09, -.01) | -.05<br>(-.09, -.01) |                    | .322                | .947               | .210               | .087               | .003 |
| 2000 | -.07<br>(-.11, -.03) | -.04<br>(-.08, .00)  | -.02<br>(-.06, .02) | -.03<br>(-.07, .01)  | -.03<br>(-.07, .01)  | .02<br>(-.02, .06) |                     | .355               | .791               | .467               | .049 |
| 2250 | -.09<br>(-.13, -.05) | -.05<br>(-.09, -.01) | -.03<br>(-.07, .01) | -.05<br>(-.09, -.01) | -.04<br>(-.08, .00)  | .00<br>(-.04, .04) | -.02<br>(-.06, .02) |                    | .235               | .100               | .004 |
| 2500 | -.07<br>(-.11, -.03) | -.03<br>(-.07, .01)  | -.01<br>(-.05, .03) | -.02<br>(-.06, .02)  | -.02<br>(-.06, .02)  | .03<br>(-.01, .07) | .01<br>(-.03, .05)  | .02<br>(-.02, .06) |                    | .644               | .087 |
| 2750 | -.06<br>(-.10, -.02) | -.02<br>(-.06, .02)  | .00<br>(-.04, .04)  | -.01<br>(-.05, .03)  | -.01<br>(-.05, .03)  | .03<br>(-.01, .07) | .01<br>(-.03, .05)  | .03<br>(-.01, .07) | .01<br>(-.03, .05) |                    | .210 |
| 3000 | -.03<br>(-.07, .01)  | .00<br>(-.04, .04)   | .02<br>(-.02, .06)  | .01<br>(-.03, .05)   | .01<br>(-.03, .05)   | .06<br>(.02, .10)  | .04<br>(.00, .08)   | .06<br>(.02, .10)  | .03<br>(-.01, .07) | .03<br>(-.01, .07) |      |

**Table S2 (Related to Fig. 5 and Fig. S1).** Results of pairwise comparison in Experiment 3. Headers represent interval durations (in ms), numbers in the lower triangular matrix represent mean differences in correction rates between pairs of interval durations and their 95% confidence intervals, and numbers in the upper triangular matrix represent the corresponding *p*-values.
